# Supplementary material for: Glycans from Fasciola hepatica Modulate the Host Immune Response and TLR-Induced Maturation of Dendritic Cells
Source: PubMed Central journal article supplement (PMC4697847; doi:10.1371/journal.pntd.0004234), 2015-12-31

# S2 Fig.

## A

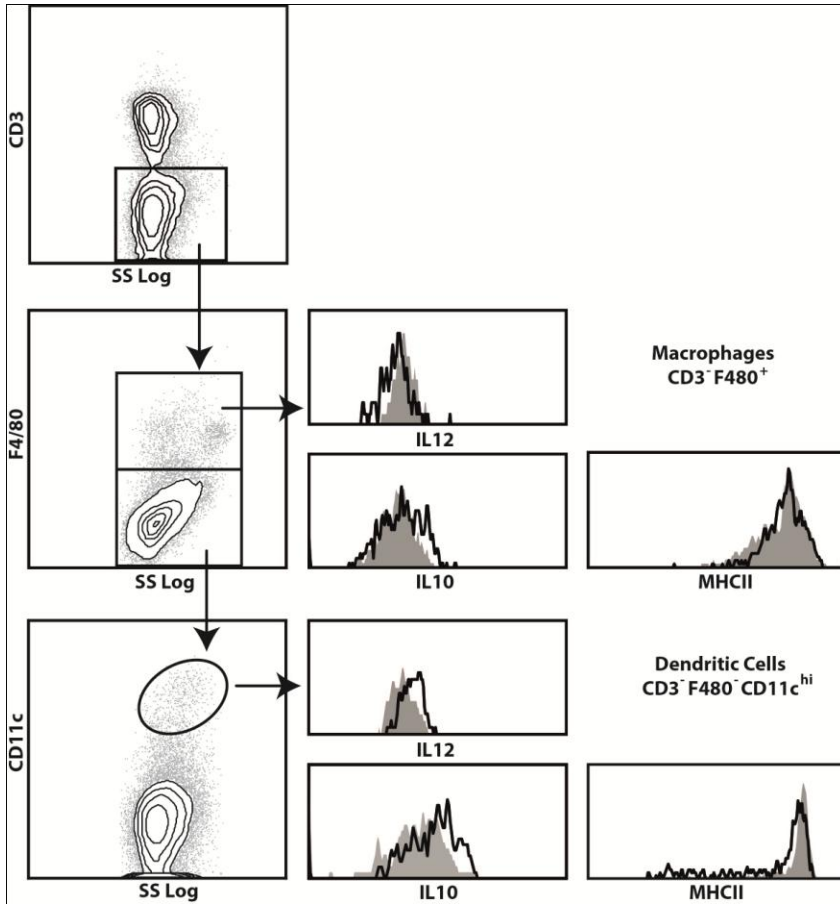

## B

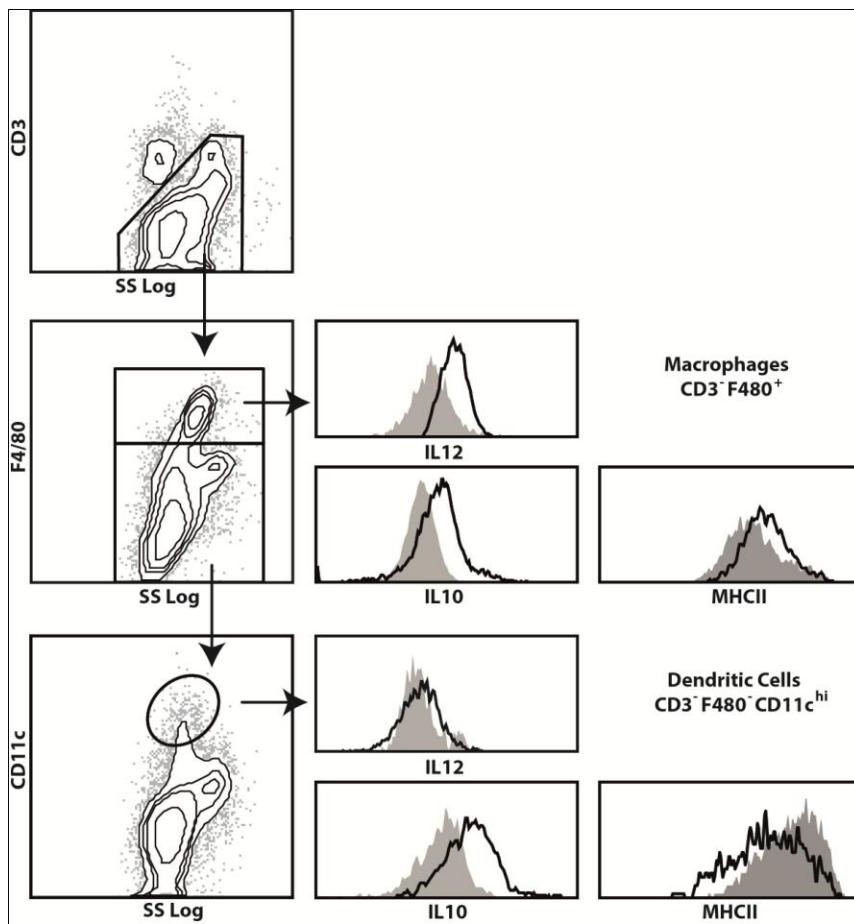

Supplement: pntd.0004234.s002.pdf [file pntd.0004234.s002.pdf]
